# Supplementary material for: The impact of replacing wheat flour with cellular legume powder on starch bioaccessibility, glycaemic response and bread roll quality: A double-blind randomised controlled trial in healthy participants
Source: PubMed Central journal article supplement (PMC7859705; doi:10.1016/j.foodhyd.2020.106565), 2021-05
Supplement: mmc1.pdf [file mmc1.pdf]

## Supplementary Material

**Table S1: Characteristics of the participants who enrolled in each study<sup>1</sup>**

|                                           | <b>STUDY 1 (n = 20)</b>                   | <b>STUDY 2 (n = 21)</b>        |
|-------------------------------------------|-------------------------------------------|--------------------------------|
| Age (years)                               | 26.0 ± 4.08                               | 27.9 ± 4.91                    |
| Gender                                    | 8 males;<br>12 females                    | 10 males;<br>10 females        |
| Ethnicity                                 | White 10<br>Asian 7<br>Mixed 1<br>Black 2 | White 14<br>Asian 4<br>Mixed 2 |
| Body mass index (kg/m <sup>2</sup> )      | 23.8 ± 4.67                               | 24.7 ± 3.1                     |
| Systolic /diastolic blood pressure (mmHg) | 106.3 ± 10.67<br>/ 70.8 ± 7.43            | 111.1 ± 12.77<br>/75.3 ± 7.62  |
| Fasted plasma glucose (mmol/L)            | 4.79 ± 0.43                               | 4.78 ± 0.40                    |
| Serum triacylglycerols (mmol/L)           | 0.74 ± 0.19                               | 0.89 ± 0.58                    |
| Serum total cholesterol (mmol/L)          | 4.63 ± 0.84                               | 4.62 ± 1.04                    |

<sup>1</sup>Values are means ± SD. Ethnicity was self-reported.

Figure S1: Study 1 CONSORT diagram

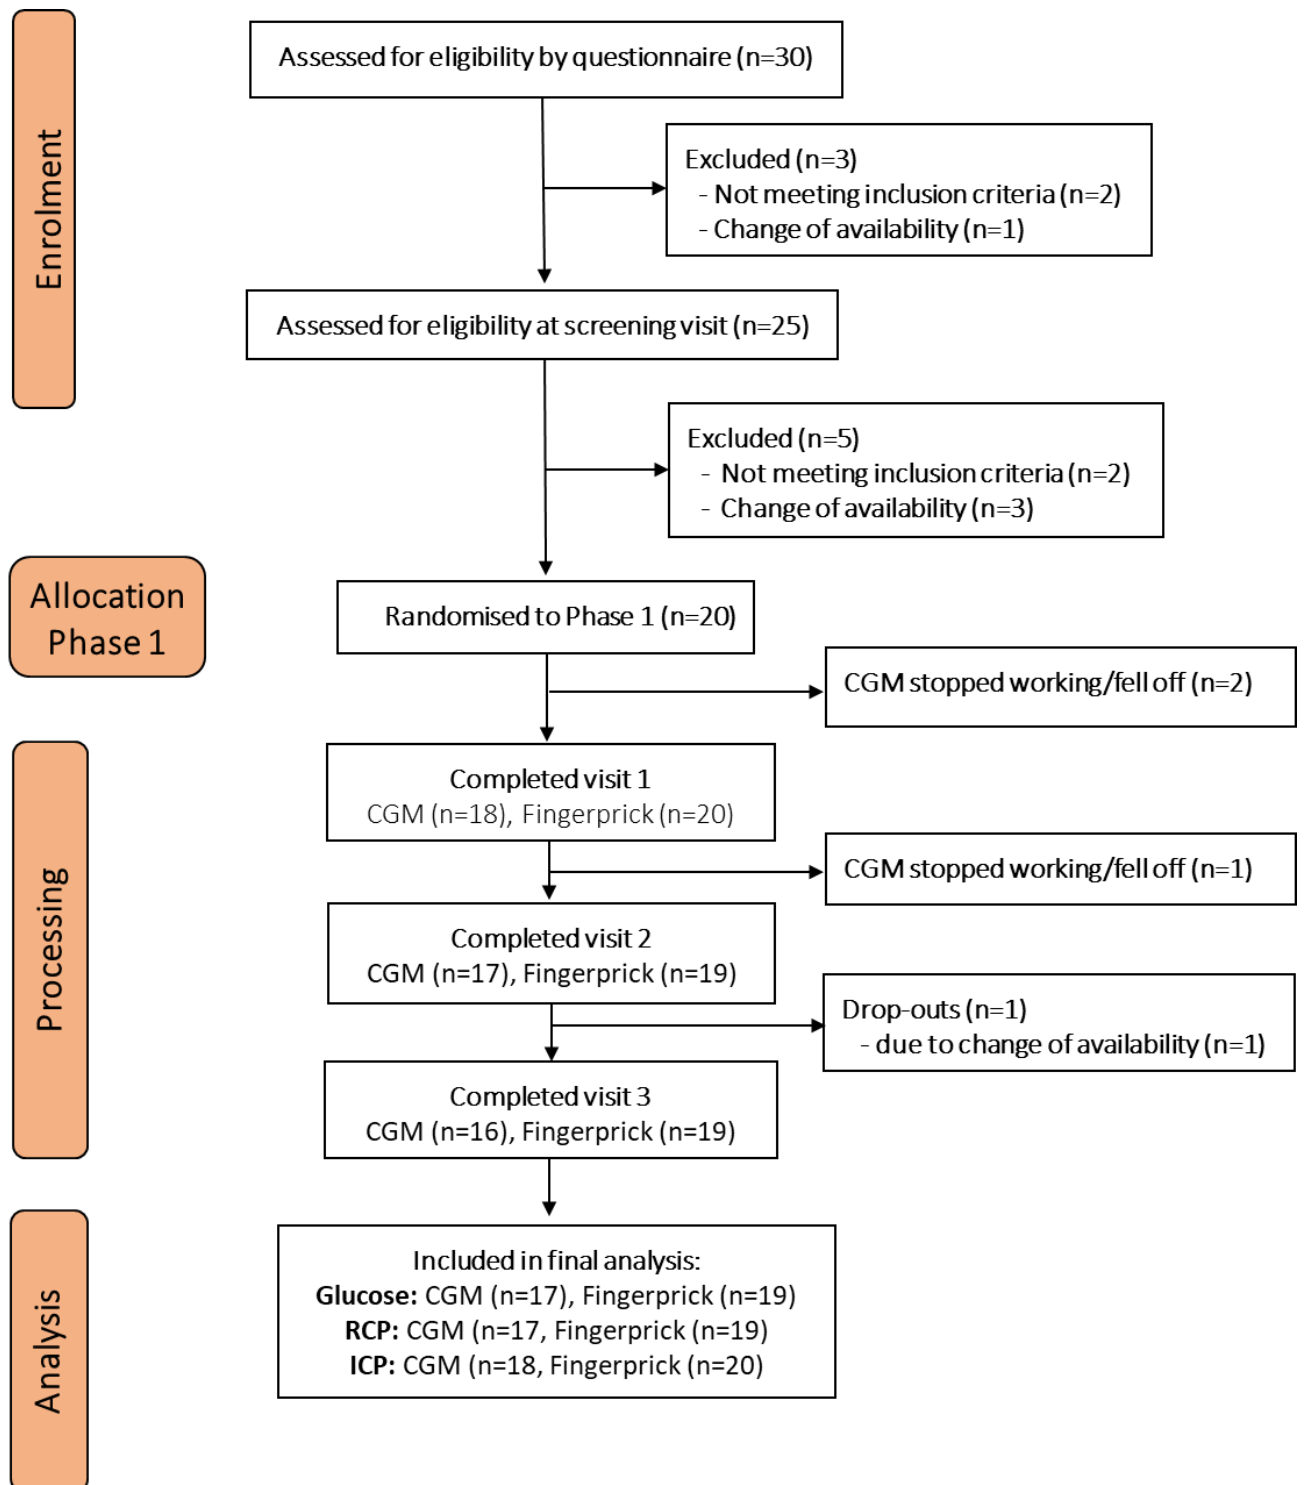

Figure S2: Study 2 CONSORT diagram

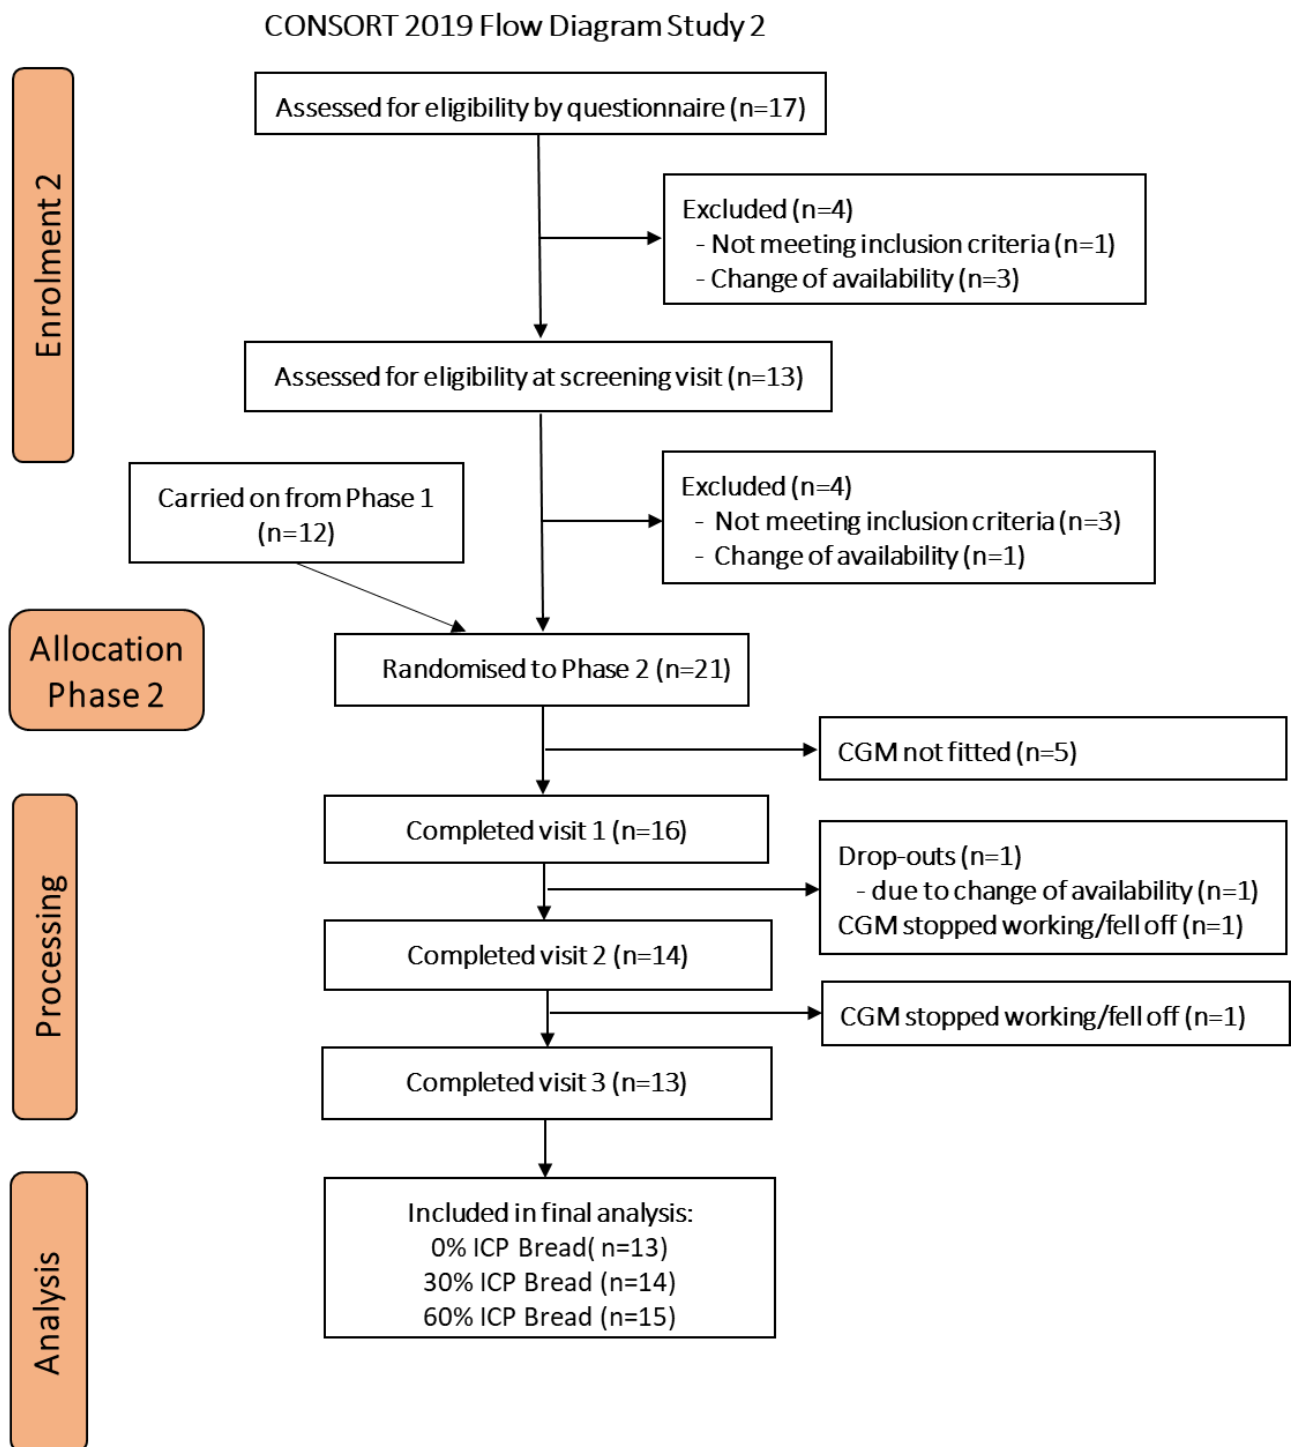

**Table S2: Nutrient composition (g/100g as served) of bread rolls made with 0, 30 and 60% intact cell powders (ICP)**

|                                                      | <b>0% ICP</b> | <b>30% ICP</b> | <b>60% ICP</b> |
|------------------------------------------------------|---------------|----------------|----------------|
| Moisture (g) <sup>1</sup>                            | 34.0          | 41.5           | 47.0           |
| Energy (kJ) <sup>1</sup>                             | 1132.0        | 1001.0         | 906.1          |
| Protein (g)                                          | 11.2          | 11.8           | 13.5           |
| from wheat <sup>3</sup>                              | 94%           | 65%            | 49%            |
| from chickpea <sup>3</sup>                           | 0%            | 29%            | 44%            |
| Total Fat (g) <sup>1</sup>                           | 2.9           | 3.7            | 4.4            |
| <i>Saturated fatty acids (g)</i> <sup>1</sup>        | <i>0.87</i>   | <i>0.96</i>    | <i>1.05</i>    |
| <i>Monounsaturated fatty acids (g)</i> <sup>1</sup>  | <i>1.04</i>   | <i>1.27</i>    | <i>1.49</i>    |
| <i>Polyunsaturated fatty acids (g)</i> <sup>1</sup>  | <i>0.86</i>   | <i>1.31</i>    | <i>1.67</i>    |
| Total Starch (g) <sup>2</sup>                        | 39.4          | 29.9           | 21.1           |
| from wheat <sup>3</sup>                              | 100%          | 75%            | 41%            |
| from chickpea <sup>3</sup>                           | 0%            | 25%            | 59%            |
| Digestible starch <sup>2</sup>                       | 99%           | 96%            | 93%            |
| Resistant starch <sup>2</sup>                        | 1%            | 4%             | 7%             |
| Total Sugars (g)                                     | 2.4           | 2.3            | 2.8            |
| Potentially available carbohydrates (g) <sup>4</sup> | 41.8          | 32.2           | 23.9           |
| Dietary Fibre (g) <sup>1</sup>                       | 2.3           | 4.1            | 5.3            |
| Sodium (mg)                                          | 364.0         | 362.0          | 373.6          |

<sup>1</sup>Proximate determinations by ALS Laboratories, <sup>2</sup>Direct measurements obtained using Megazyme total and resistant starch kits. <sup>3</sup>Estimated proportion of protein or starch originating from wheat (wheat flour, gluten) and chickpea (ICP) calculated from ingredient composition and amounts used in each recipe, <sup>4</sup> 'Potentially available carbohydrates' is the sum of total starch and sugars. Data is shown for 0, 30 and 60% bread roll types, where the % refers to proportion of wheat flour replaced with ICP (w/w).

Figure S3: Results of colour analysis of bread rolls made with 0, 30 or 60% intact cell powders

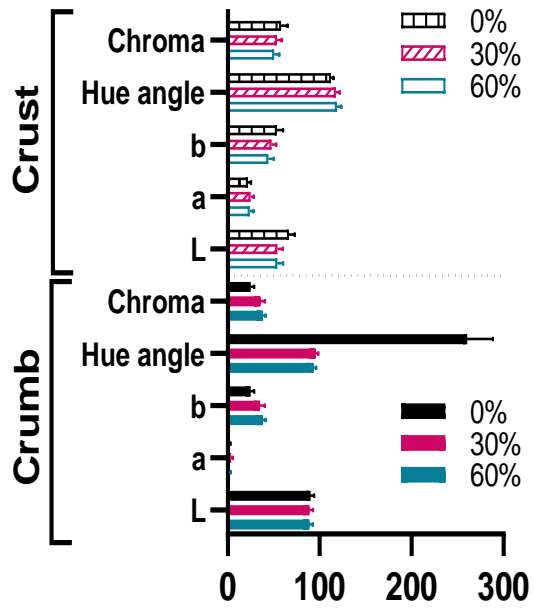

## Supplementary Data 1:

### Postprandial interstitial glucose responses to test drinks

| DRINK<br>Time (min) | GLUCOSE DRINK |      |    | RUPTURED CELL POWDER |      |    | INTACT CELL POWDER |      |    |
|---------------------|---------------|------|----|----------------------|------|----|--------------------|------|----|
|                     | Mean          | SD   | n  | Mean                 | SD   | n  | Mean               | SD   | n  |
| 15                  | 1.05          | 0.55 | 17 | 0.68                 | 0.46 | 17 | 0.38               | 0.33 | 18 |
| 30                  | 2.80          | 0.93 | 17 | 1.74                 | 0.91 | 17 | 1.19               | 0.55 | 18 |
| 45                  | 3.23          | 1.46 | 17 | 1.81                 | 1.18 | 17 | 1.57               | 0.70 | 18 |
| 60                  | 2.43          | 1.61 | 17 | 1.05                 | 0.95 | 17 | 1.26               | 0.64 | 18 |
| 75                  | 1.60          | 1.47 | 17 | 0.48                 | 0.53 | 17 | 0.81               | 0.52 | 18 |
| 90                  | 1.18          | 1.28 | 17 | 0.19                 | 0.44 | 17 | 0.44               | 0.51 | 18 |
| 105                 | 0.91          | 1.16 | 17 | 0.09                 | 0.57 | 17 | 0.13               | 0.53 | 17 |
| 120                 | 0.56          | 1.04 | 16 | 0.07                 | 0.53 | 16 | 0.05               | 0.42 | 16 |

## Supplementary Data 2:

### Postprandial capillary glucose responses to test drinks

| DRINK<br>Time (min) | GLUCOSE DRINK |      |    | RUPTURED CELL POWDER |      |    | INTACT CELL POWDER |      |    |
|---------------------|---------------|------|----|----------------------|------|----|--------------------|------|----|
|                     | Mean          | SD   | n  | Mean                 | SD   | n  | Mean               | SD   | n  |
| 10                  | 0.84          | 0.55 | 19 | 0.19                 | 0.43 | 18 | 0.17               | 0.35 | 18 |
| 20                  | 2.37          | 1.14 | 19 | 1.18                 | 0.64 | 19 | 0.68               | 0.64 | 20 |
| 30                  | 2.84          | 1.02 | 19 | 1.73                 | 1.14 | 19 | 1.31               | 0.81 | 20 |
| 45                  | 2.45          | 1.42 | 19 | 1.36                 | 1.10 | 19 | 1.24               | 0.96 | 19 |
| 60                  | 2.06          | 1.38 | 19 | 0.69                 | 0.75 | 18 | 1.04               | 0.96 | 20 |
| 90                  | 1.16          | 1.25 | 19 | 0.26                 | 0.72 | 19 | 0.50               | 0.72 | 20 |
| 120                 | 0.67          | 1.08 | 19 | 0.00                 | 0.72 | 19 | 0.09               | 0.61 | 20 |

### Supplementary Data 3:

#### Postprandial interstitial glucose responses to bread rolls

| BREAD TYPE<br>Time (min) | 0% BREAD ROLL |      |    | 30% BREAD ROLL |      |    | 60% BREAD ROLL |      |    |
|--------------------------|---------------|------|----|----------------|------|----|----------------|------|----|
|                          | Mean          | SD   | n  | Mean           | SD   | n  | Mean           | SD   | n  |
| 0                        | 0.00          | 0.00 | 13 | 0.00           | 0.00 | 14 | 0.00           | 0.00 | 15 |
| 15                       | 0.65          | 0.48 | 13 | 0.72           | 0.61 | 14 | 0.40           | 0.38 | 15 |
| 30                       | 2.11          | 0.69 | 13 | 1.71           | 0.82 | 14 | 1.26           | 0.44 | 15 |
| 45                       | 2.53          | 0.92 | 13 | 1.64           | 0.89 | 14 | 1.35           | 0.52 | 15 |
| 60                       | 1.78          | 1.16 | 13 | 0.67           | 0.74 | 14 | 0.75           | 0.57 | 15 |
| 75                       | 1.10          | 1.05 | 13 | 0.25           | 0.80 | 14 | 0.44           | 0.75 | 15 |
| 90                       | 0.85          | 0.80 | 13 | 0.38           | 0.83 | 14 | 0.45           | 0.65 | 15 |
| 105                      | 0.75          | 0.69 | 13 | 0.40           | 0.69 | 14 | 0.52           | 0.50 | 15 |
| 120                      | 0.68          | 0.71 | 13 | 0.26           | 0.67 | 14 | 0.58           | 0.67 | 15 |
| 135                      | 0.55          | 0.78 | 13 | 0.18           | 0.71 | 14 | 0.51           | 0.68 | 15 |
| 150                      | 0.36          | 0.79 | 13 | 0.04           | 0.64 | 14 | 0.38           | 0.54 | 15 |
| 175                      | 0.06          | 0.71 | 13 | -0.06          | 0.59 | 14 | 0.24           | 0.58 | 15 |
| 190                      | -0.20         | 0.82 | 13 | -0.16          | 0.56 | 14 | 0.22           | 0.53 | 15 |
| 205                      | -0.39         | 0.81 | 13 | -0.18          | 0.65 | 13 | 0.15           | 0.49 | 15 |
| 220                      | -0.38         | 0.66 | 13 | -0.12          | 0.77 | 13 | 0.06           | 0.48 | 14 |
| 235                      | -0.28         | 0.60 | 13 | -0.08          | 0.77 | 13 | 0.13           | 0.49 | 14 |
| 250                      | -0.25         | 0.62 | 13 | -0.07          | 0.73 | 13 | 0.27           | 0.81 | 14 |
